# Supplementary material for: Fine Tuning ECG Interpretation for Young Athletes: ECG Screening Using Z-score-based Analysis
Source: PubMed Central journal article supplement (PMC11499507; doi:10.1186/s40798-024-00775-9), 2024-10-23

Sports Medicine - Open

**Fine tuning ECG interpretation for young athletes: ECG screening using Z-score-based analysis**

Authors

Jihyun Park<sup>1,4</sup>, Chieko Kimata<sup>2</sup>, Justin Young<sup>3</sup>, James C Perry<sup>1,5</sup>, Andras Bratincsak<sup>3,4</sup>

Affiliations

1. University of California San Diego School of Medicine, Department of Pediatrics, San Diego, CA, USA
2. Hawaii Pacific Health, Patient Safety & Quality Services, Honolulu, HI, USA
3. Hawaii Pacific Health Medical Group, Hawaii Pacific Health, Honolulu, HI, USA
4. John A Burns School of Medicine, University of Hawaii, Department of Pediatrics, University of Hawaii, Honolulu, HI, USA
5. Division of Pediatric Cardiology, Stanford University, Stanford, California, USA

Correspondence:

Jihyun Park, MD

3020 Children's Way

MC5004

San Diego, CA 92123

E-mail: [jip019@health.ucsd.edu](mailto:jip019@health.ucsd.edu)

**Supplementary Figure 1: Distribution of values for ECG variables in controls and athletes by age. UH Athlete refers to the athletes and Non-UH Athlete refers to control cohort. RR interval represents heart rate.** A: Distribution of values for RR interval, used as surrogate of heart rate, in athlete and control cohort by age. B: Distribution of values for PR interval in athlete and control cohort by age. C: Distribution of values for R axis, demonstrating degree of axis deviation, in athlete and control cohort by age. D: Distribution of values for QT interval in athlete and control cohort by age. E: Distribution of values for QRS duration in athlete and control cohort by age. F: Distribution of values for T wave peak amplitude in lead II in athlete and control cohort by age. G: Distribution of values for T wave peak amplitude in lead aVF in athlete and control cohort by age. H: Distribution of values for T wave peak amplitude in lead V6 in athlete and control cohort by age. I: Distribution of values for T wave area in lead II in athlete and control cohort by age. J: Distribution of values for T wave area in lead aVF in athlete and control cohort by age. K: Distribution of values for S wave peak amplitude in lead V1 in athlete and control cohort by age. L: Distribution of values for S wave peak amplitude in lead V2 in athlete and control cohort by age. M: Distribution of values for Q wave peak amplitude in lead II in athlete and control cohort by age. N: Distribution of values for Q wave peak amplitude in lead V6 in athlete and control cohort by age. O: Distribution of values for R wave peak amplitude in lead II in athlete and control cohort by age. P: Distribution of values for R wave peak amplitude in lead V6 in athlete and control cohort by age. Q: Distribution of values for R wave peak amplitude in lead V5 in athlete and control cohort by age. R: Distribution of values for R' peak amplitude in lead V1 in athlete and control cohort by age. S: Distribution of values for R' area in lead V1 in athlete and control cohort by age. T: Distribution of values for R' duration in lead V1 in athlete and control cohort by age

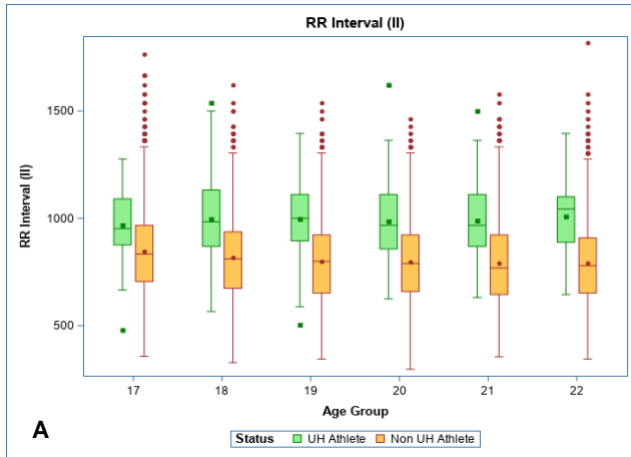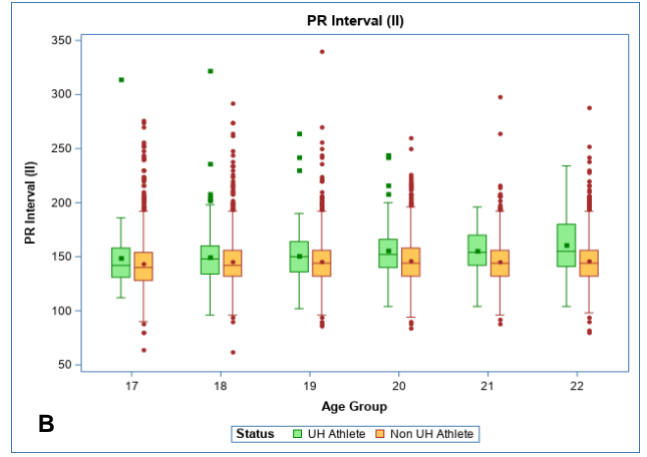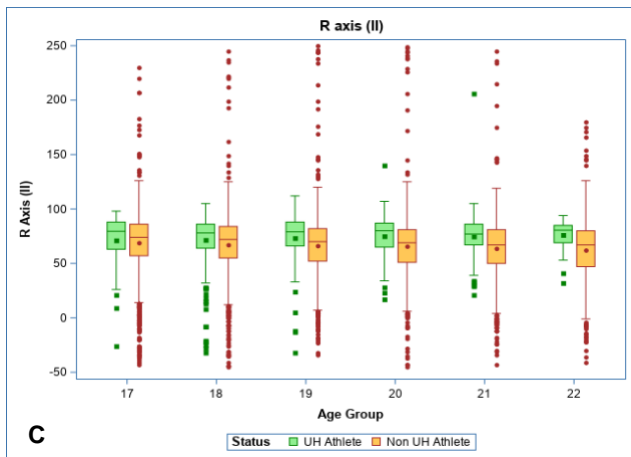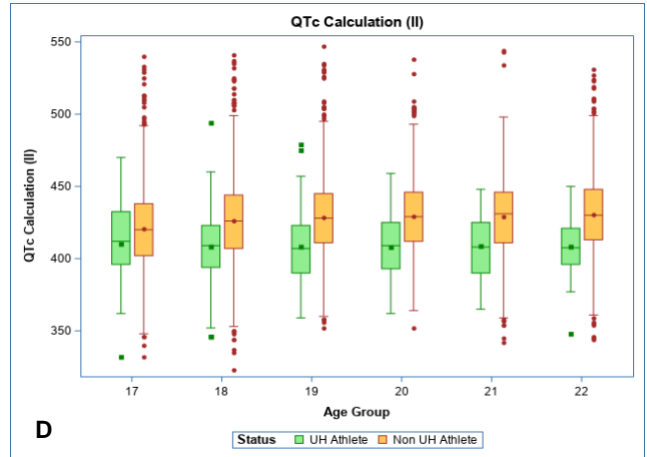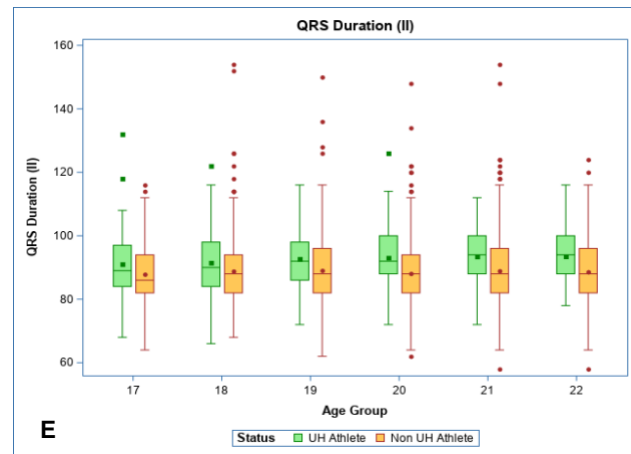

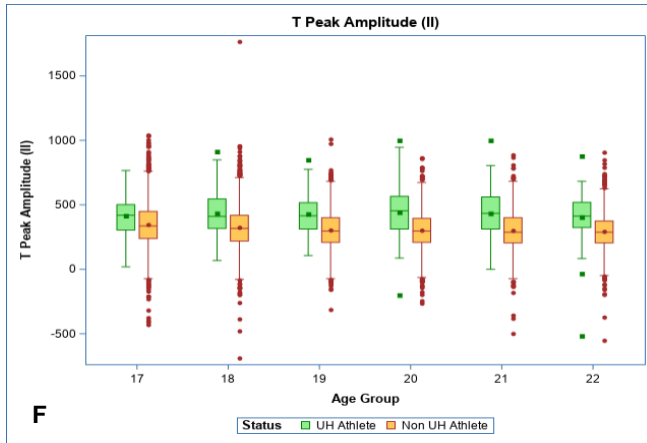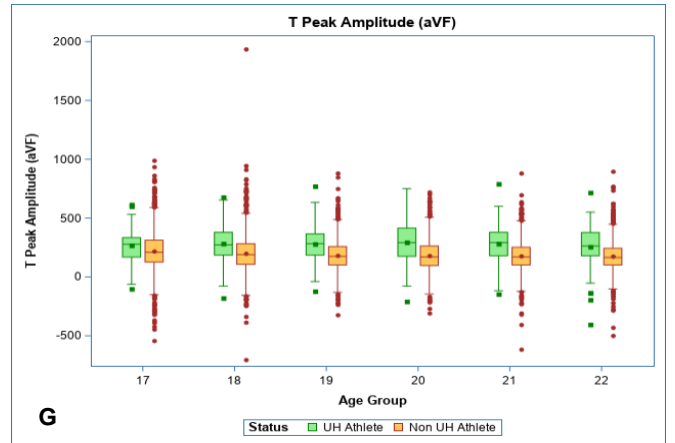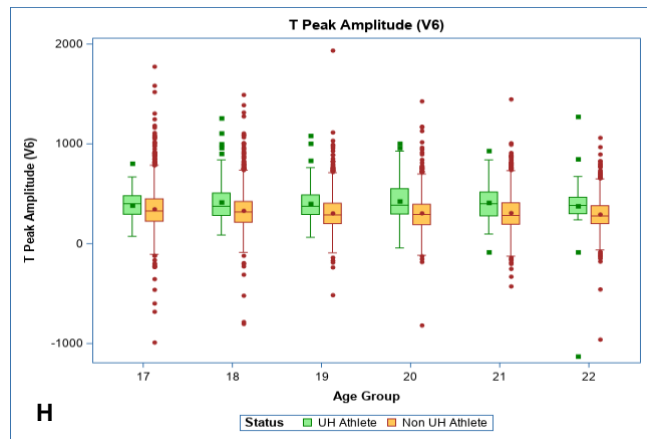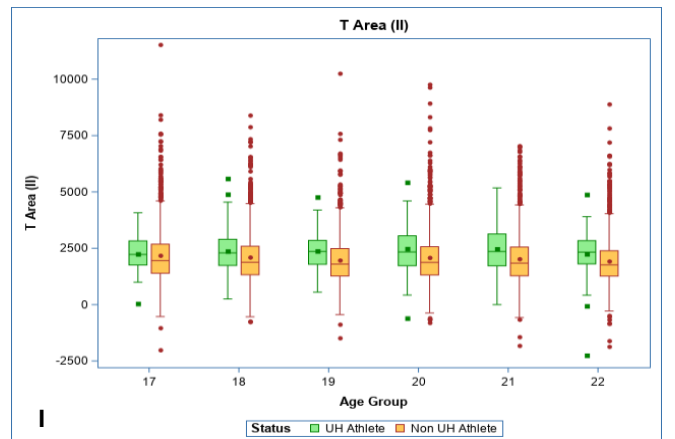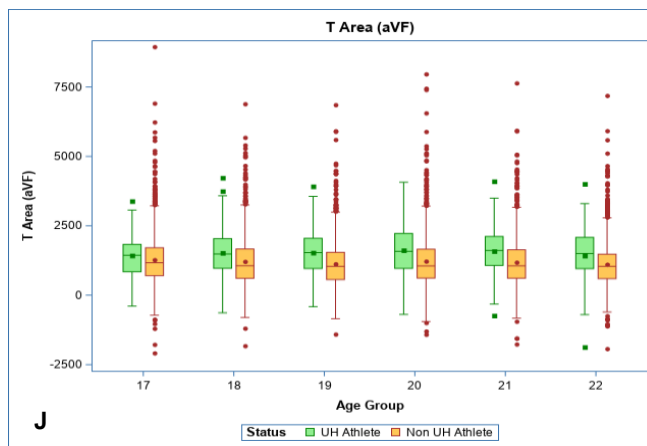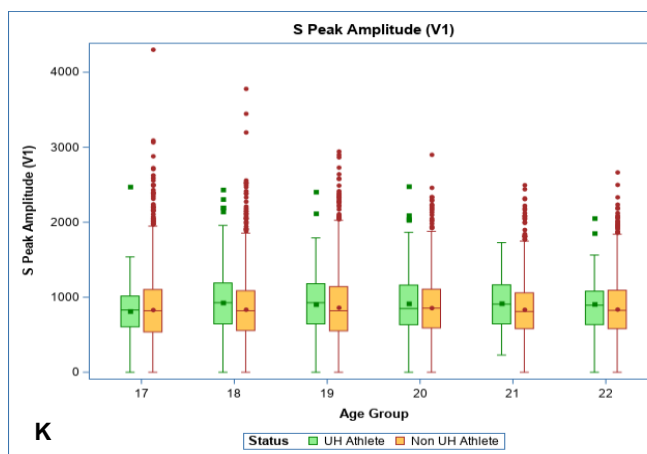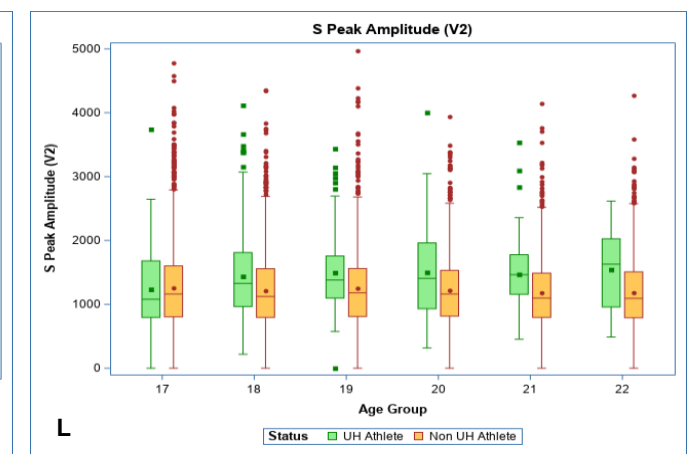

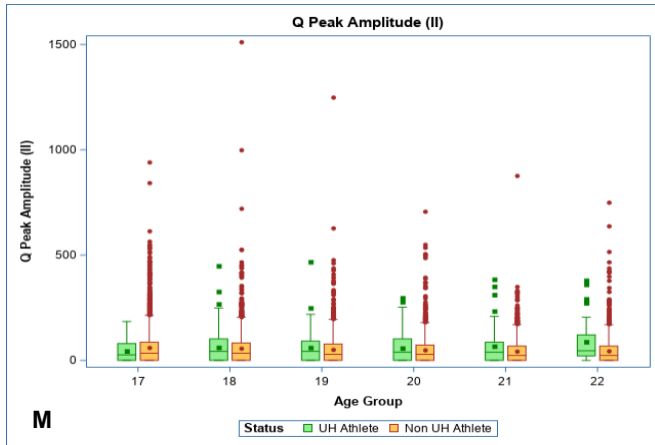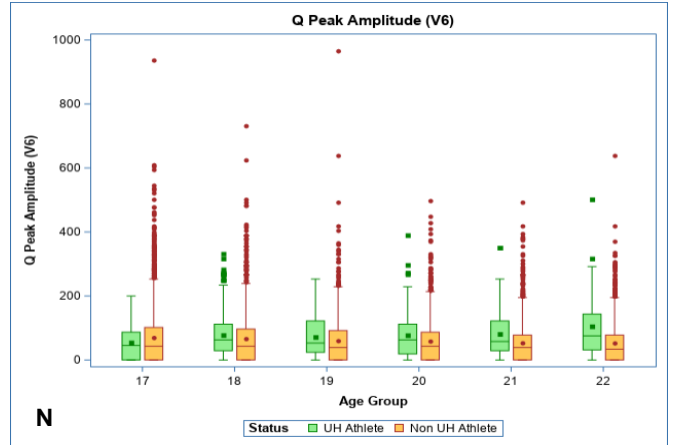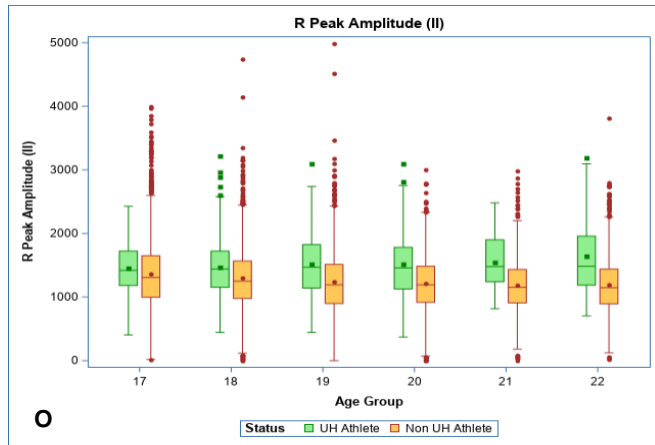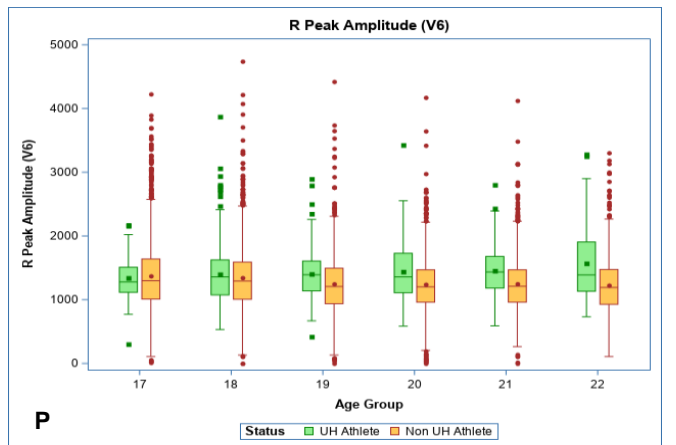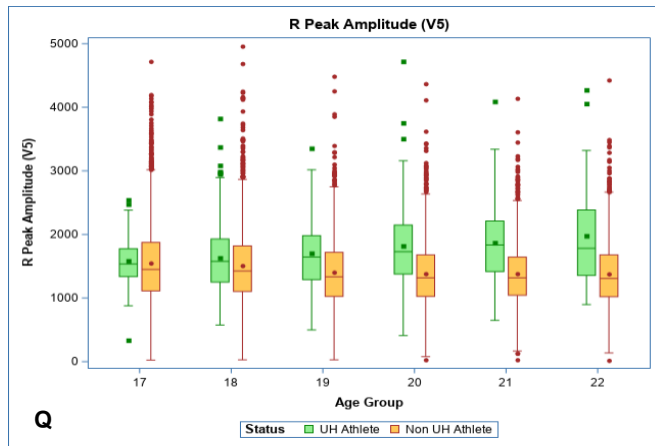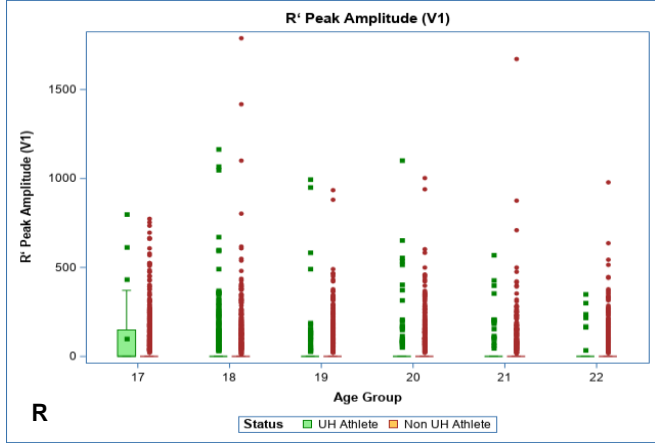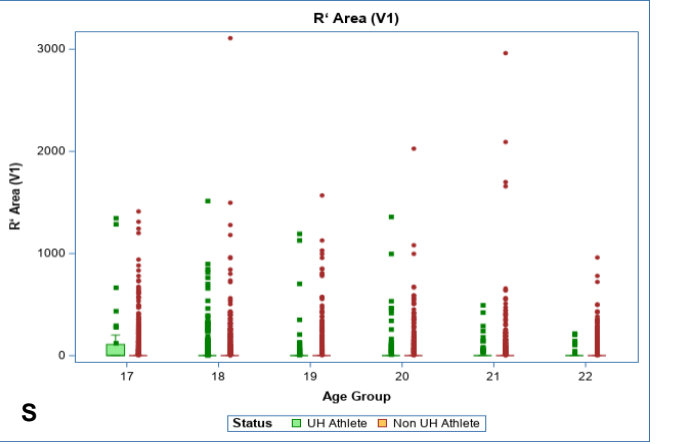

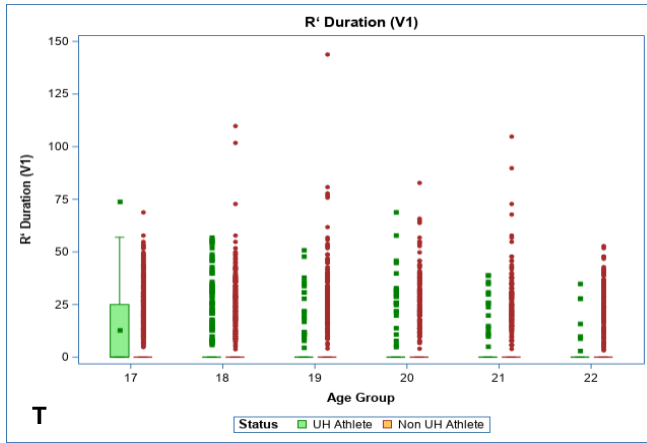

Supplement: 40798_2024_775_MOESM3_ESM.pdf [file 40798_2024_775_MOESM3_ESM.pdf]
