# Supplementary material for: Fine Tuning ECG Interpretation for Young Athletes: ECG Screening Using Z-score-based Analysis
Source: PubMed Central journal article supplement (PMC11499507; doi:10.1186/s40798-024-00775-9), 2024-10-23
Supplement: 40798_2024_775_MOESM1_ESM.pdf [file 40798_2024_775_MOESM1_ESM.pdf]

Sports Medicine - Open

**Fine tuning ECG interpretation for young athletes: ECG screening using Z-score-based analysis**

Authors

Jihyun Park<sup>1,4</sup>, Chieko Kimata<sup>2</sup>, Justin Young<sup>3</sup>, James C Perry<sup>1,5</sup>, Andras Bratincsak<sup>3,4</sup>

Affiliations

1. University of California San Diego School of Medicine, Department of Pediatrics, San Diego, CA, USA
2. Hawaii Pacific Health, Patient Safety & Quality Services, Honolulu, HI, USA
3. Hawaii Pacific Health Medical Group, Hawaii Pacific Health, Honolulu, HI, USA
4. John A Burns School of Medicine, University of Hawaii, Department of Pediatrics, University of Hawaii, Honolulu, HI, USA
5. Division of Pediatric Cardiology, Stanford University, Stanford, California, USA

Correspondence:

Jihyun Park, MD

3020 Children's Way

MC5004

San Diego, CA 92123

E-mail: [jip019@health.ucsd.edu](mailto:jip019@health.ucsd.edu)

**Supplementary table 1:** Relevant positive answers in the health screening questionnaire for collegiate athletes

| Questions/Items                                                                                                                         |                                                                                                                                                                           | Number of people who answered Yes                      |            |
|-----------------------------------------------------------------------------------------------------------------------------------------|---------------------------------------------------------------------------------------------------------------------------------------------------------------------------|--------------------------------------------------------|------------|
| Past Medical History                                                                                                                    | Asthma                                                                                                                                                                    | 6                                                      |            |
|                                                                                                                                         | Diabetes                                                                                                                                                                  | 0                                                      |            |
|                                                                                                                                         | Hypertension                                                                                                                                                              | 1                                                      |            |
|                                                                                                                                         | Seizures                                                                                                                                                                  | 0                                                      |            |
|                                                                                                                                         | Other                                                                                                                                                                     | 4                                                      |            |
| Current Medications (Any cardiac medications including antiarrhythmics, antihypertensives, and/or diuretics? Albuterol PRN is excluded) |                                                                                                                                                                           | 1 (Lisinopril)                                         |            |
| Cardiac related symptoms/history                                                                                                        | Do you get chest pain when you exercise?                                                                                                                                  | 7                                                      |            |
|                                                                                                                                         | Have you ever passed out during or immediately after exercise?                                                                                                            | 6                                                      |            |
|                                                                                                                                         | Do you have difficulty breathing or unexplained fatigue during exercise that is new or getting worse?                                                                     | 4                                                      |            |
|                                                                                                                                         | Does your heart ever race (suddenly beat fast) without good reason?                                                                                                       | 2                                                      |            |
|                                                                                                                                         | Have you ever been diagnosed with any of the following conditions?                                                                                                        | High blood pressure                                    | 1          |
|                                                                                                                                         |                                                                                                                                                                           | Heart infection                                        | 0          |
|                                                                                                                                         |                                                                                                                                                                           | High cholesterol                                       | 0          |
|                                                                                                                                         |                                                                                                                                                                           | Kawasaki disease                                       | 1          |
|                                                                                                                                         |                                                                                                                                                                           | Another heart problem                                  | 2 (murmur) |
|                                                                                                                                         | Has a doctor ever ordered a test for your heart? (for example, ECG/EKG, and/ or Echocardiogram)                                                                           |                                                        | 5          |
| Family history                                                                                                                          | Has any of your family died from a heart problem before the age of 50?                                                                                                    | 4                                                      |            |
|                                                                                                                                         | Has anyone in your family died suddenly for an unknown reason before the age of 50 (including sudden infant death syndrome (SIDS), unexpected car accident, or drowning)? | 1                                                      |            |
|                                                                                                                                         | Does anyone in your family have any of the following medical problems?                                                                                                    | Hypertrophic cardiomyopathy                            | 1          |
|                                                                                                                                         |                                                                                                                                                                           | Dilated cardiomyopathy                                 | 0          |
|                                                                                                                                         |                                                                                                                                                                           | Catecholaminergic polymorphic ventricular tachycardia  | 1          |
|                                                                                                                                         |                                                                                                                                                                           | Brugada syndrome                                       | 0          |
|                                                                                                                                         |                                                                                                                                                                           | Arrhythmogenic right ventricular cardiomyopathy (ARVC) | 0          |
|                                                                                                                                         |                                                                                                                                                                           | Marfan syndrome                                        | 0          |
|                                                                                                                                         |                                                                                                                                                                           | Long QT syndrome                                       | 0          |
|                                                                                                                                         |                                                                                                                                                                           | Short QT syndrome                                      | 0          |
|                                                                                                                                         |                                                                                                                                                                           | SVT                                                    | 1          |
|                                                                                                                                         |                                                                                                                                                                           | Unknown heart condition                                | 1          |
