# Supplementary material for: Fine Tuning ECG Interpretation for Young Athletes: ECG Screening Using Z-score-based Analysis
Source: PubMed Central journal article supplement (PMC11499507; doi:10.1186/s40798-024-00775-9), 2024-10-23
Supplement: 40798_2024_775_MOESM2_ESM.pdf [file 40798_2024_775_MOESM2_ESM.pdf]

Sports Medicine - Open

**Fine tuning ECG interpretation for young athletes: ECG screening using Z-score-based analysis**

Authors

Jihyun Park<sup>1,4</sup>, Chieko Kimata<sup>2</sup>, Justin Young<sup>3</sup>, James C Perry<sup>1,5</sup>, Andras Bratincsak<sup>3,4</sup>

Affiliations

1. University of California San Diego School of Medicine, Department of Pediatrics, San Diego, CA, USA
2. Hawaii Pacific Health, Patient Safety & Quality Services, Honolulu, HI, USA
3. Hawaii Pacific Health Medical Group, Hawaii Pacific Health, Honolulu, HI, USA
4. John A Burns School of Medicine, University of Hawaii, Department of Pediatrics, University of Hawaii, Honolulu, HI, USA
5. Division of Pediatric Cardiology, Stanford University, Stanford, California, USA

Correspondence:

Jihyun Park, MD

3020 Children's Way

MC5004

San Diego, CA 92123

E-mail: [jip019@health.ucsd.edu](mailto:jip019@health.ucsd.edu)

**Supplementary table 2: Types of sports and the number of years/hours athletes have played**

|        | Types of Sports  | Number of Athletes | Years Played |        |      | Hours/week |        |      |
|--------|------------------|--------------------|--------------|--------|------|------------|--------|------|
|        |                  |                    | Mean         | Median | Mode | Mean       | Median | Mode |
| Female | Golf             | 7                  | 10.32        | 11     | 10   | 13.31      | 12     | 20   |
|        | Track            | 22                 |              |        |      |            |        |      |
|        | Volleyball       | 28                 |              |        |      |            |        |      |
|        | Softball         | 45                 |              |        |      |            |        |      |
|        | Water Polo       | 6                  |              |        |      |            |        |      |
|        | Cheer            | 6                  |              |        |      |            |        |      |
|        | Swimming         | 11                 |              |        |      |            |        |      |
|        | Tennis           | 3                  |              |        |      |            |        |      |
|        | Sailing          | 6                  |              |        |      |            |        |      |
|        | Beach Volleyball | 5                  |              |        |      |            |        |      |
|        | Soccer           | 56                 |              |        |      |            |        |      |
|        | Basketball       | 15                 |              |        |      |            |        |      |
|        | Cross Country    | 8                  |              |        |      |            |        |      |
|        | N/A              | 106                |              |        |      |            |        |      |
| Total  | 324              |                    |              |        |      |            |        |      |
| Male   | Golf             | 6                  | 9.68         | 10     | 10   | 14.34      | 14.5   | 20   |
|        | Volleyball       | 8                  |              |        |      |            |        |      |
|        | Cheer            | 3                  |              |        |      |            |        |      |
|        | Swimming         | 16                 |              |        |      |            |        |      |
|        | Tennis           | 2                  |              |        |      |            |        |      |
|        | Sailing          | 2                  |              |        |      |            |        |      |
|        | Basketball       | 32                 |              |        |      |            |        |      |
|        | Football         | 163                |              |        |      |            |        |      |
|        | Baseball         | 26                 |              |        |      |            |        |      |
|        | Diving           | 2                  |              |        |      |            |        |      |
|        | N/A              | 88                 |              |        |      |            |        |      |
|        | Total            | 348                |              |        |      |            |        |      |
