# Supplementary material for: Fine Tuning ECG Interpretation for Young Athletes: ECG Screening Using Z-score-based Analysis
Source: PubMed Central journal article supplement (PMC11499507; doi:10.1186/s40798-024-00775-9), 2024-10-23
Supplement: 40798_2024_775_MOESM4_ESM.pdf [file 40798_2024_775_MOESM4_ESM.pdf]

Sports Medicine - Open

**Fine tuning ECG interpretation for young athletes: ECG screening using Z-score-based analysis**

Authors

Jihyun Park<sup>1,4</sup>, Chieko Kimata<sup>2</sup>, Justin Young<sup>3</sup>, James C Perry<sup>1,5</sup>, Andras Bratincsak<sup>3,4</sup>

Affiliations

1. University of California San Diego School of Medicine, Department of Pediatrics, San Diego, CA, USA
2. Hawaii Pacific Health, Patient Safety & Quality Services, Honolulu, HI, USA
3. Hawaii Pacific Health Medical Group, Hawaii Pacific Health, Honolulu, HI, USA
4. John A Burns School of Medicine, University of Hawaii, Department of Pediatrics, University of Hawaii, Honolulu, HI, USA
5. Division of Pediatric Cardiology, Stanford University, Stanford, California, USA

Correspondence:

Jihyun Park, MD

3020 Children's Way

MC5004

San Diego, CA 92123

E-mail: [jip019@health.ucsd.edu](mailto:jip019@health.ucsd.edu)

**Supplementary Figure 2: Distribution of Z-scores of clinically significant ECG variables in controls and athletes by age and sex.** Non-athletes refer to control cohort. A: Distribution of Z-scores for heart rate in athletes and controls by age and sex. B: Distribution of Z-score for PR interval in athletes and controls by age and sex. C: Distribution of Z-score for QTc in athletes and controls by age and sex. D: Distribution of Z-score for R axis in athletes and controls by age and sex. E: Distribution of Z-score for R wave peak amplitude in lead II in athletes and controls by age and sex. F: Distribution of Z-score for T wave peak amplitude in lead II in athletes and controls by age and sex. G: Distribution of Z-score for S wave peak amplitude in lead V2 in athletes and controls by age and sex. H: Distribution of Z-score for R wave peak amplitude in lead V5 in athletes and controls by age and sex. I: Distribution of Z-score for R wave peak amplitude in lead V6 in athletes and controls by age and sex.

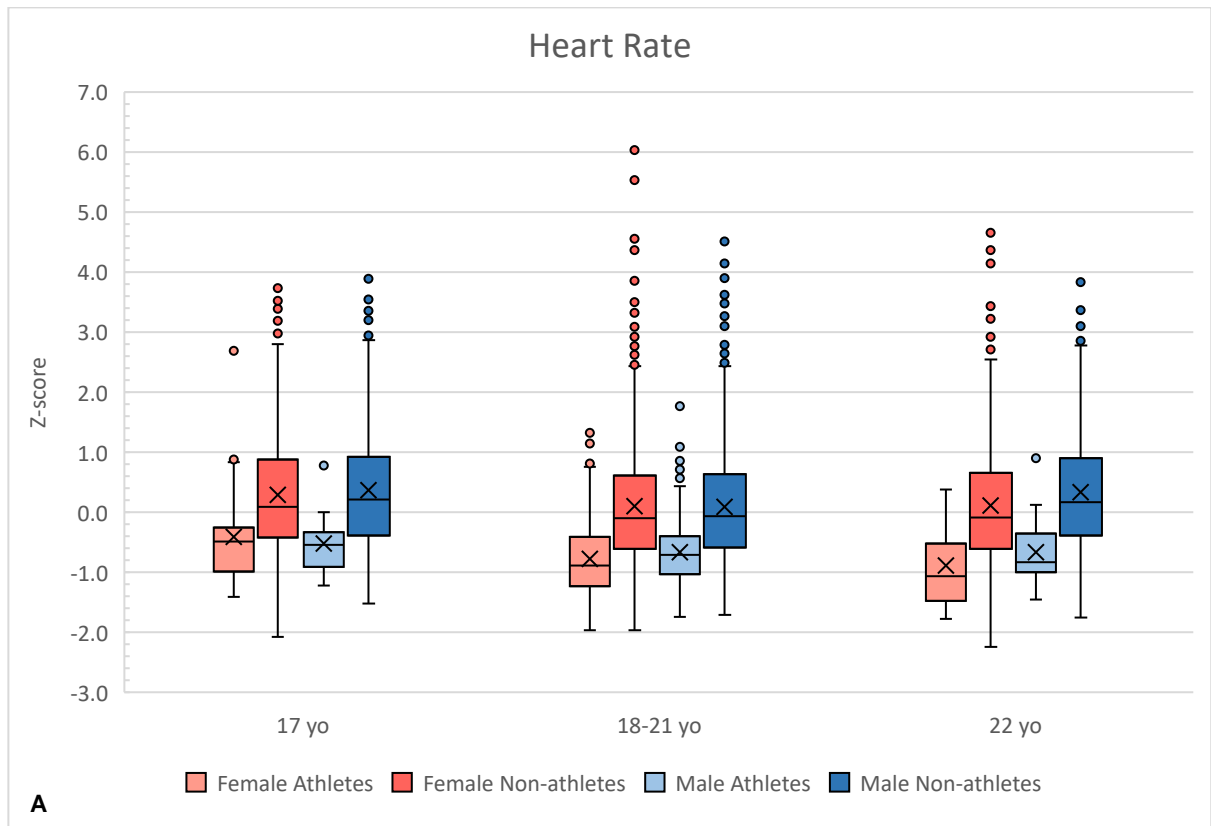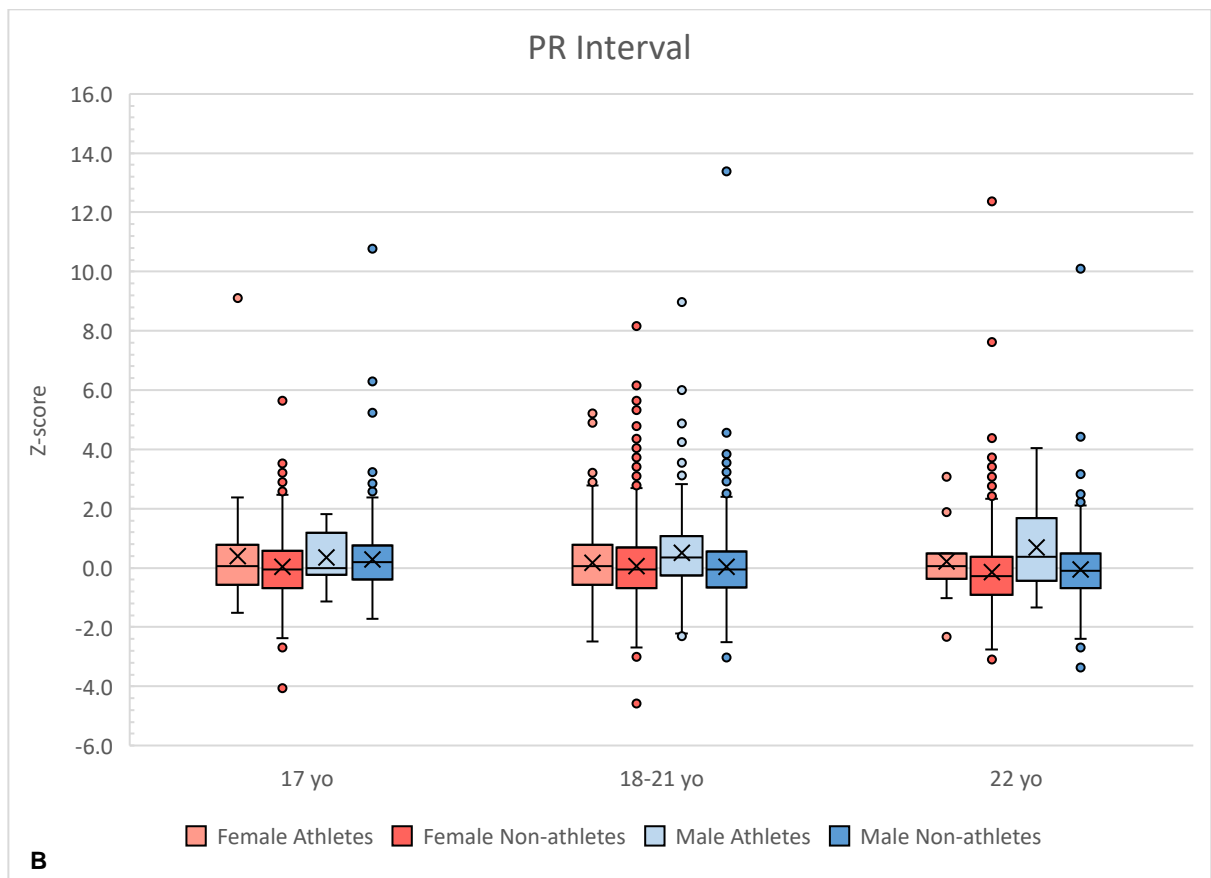

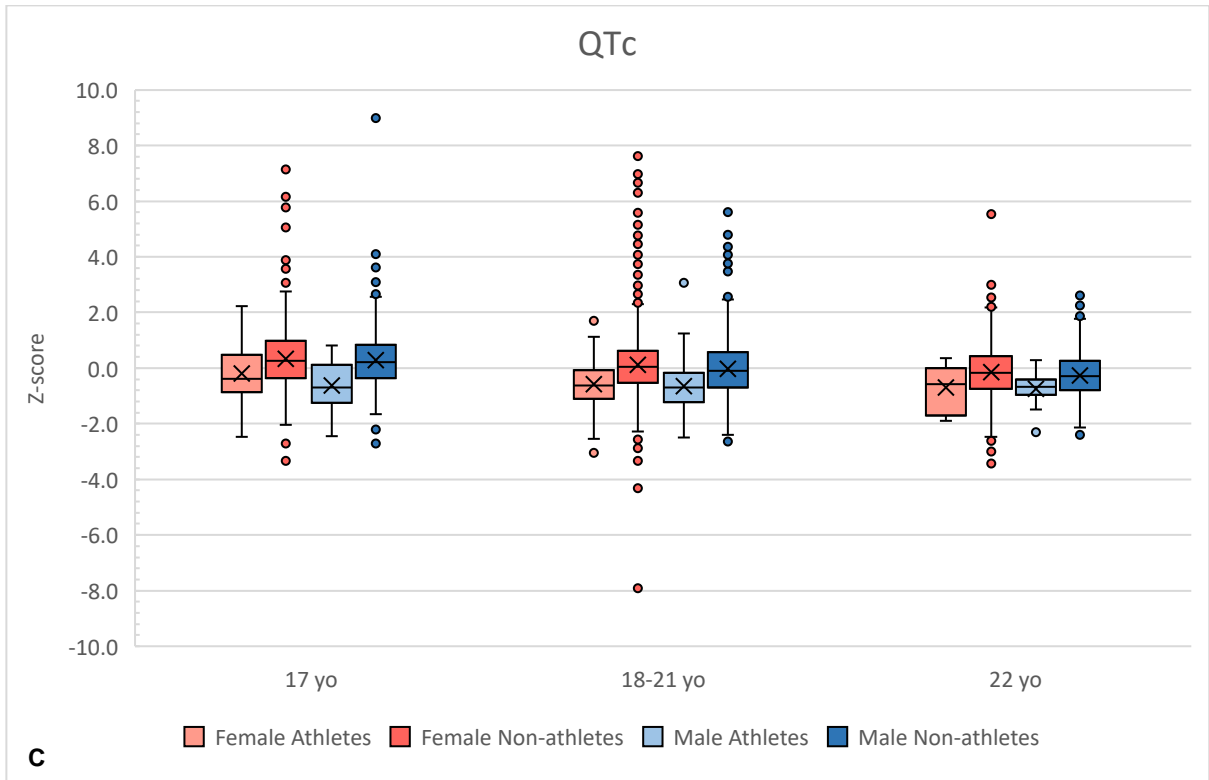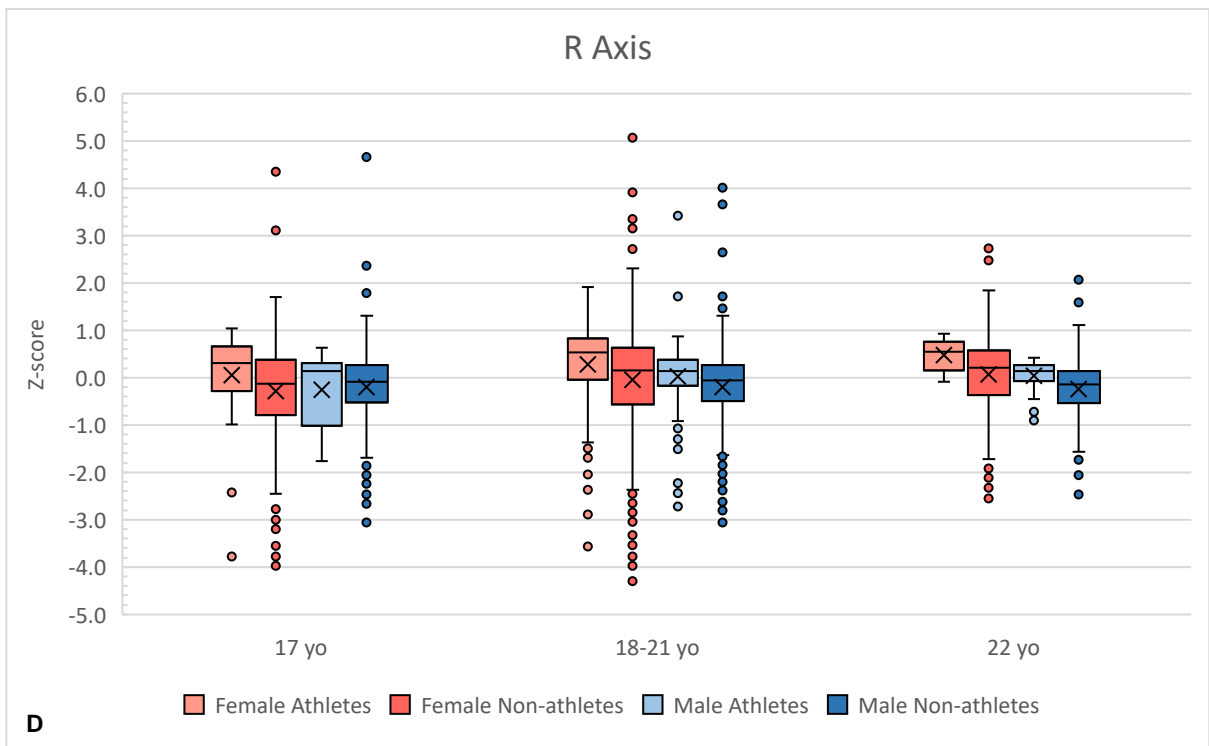

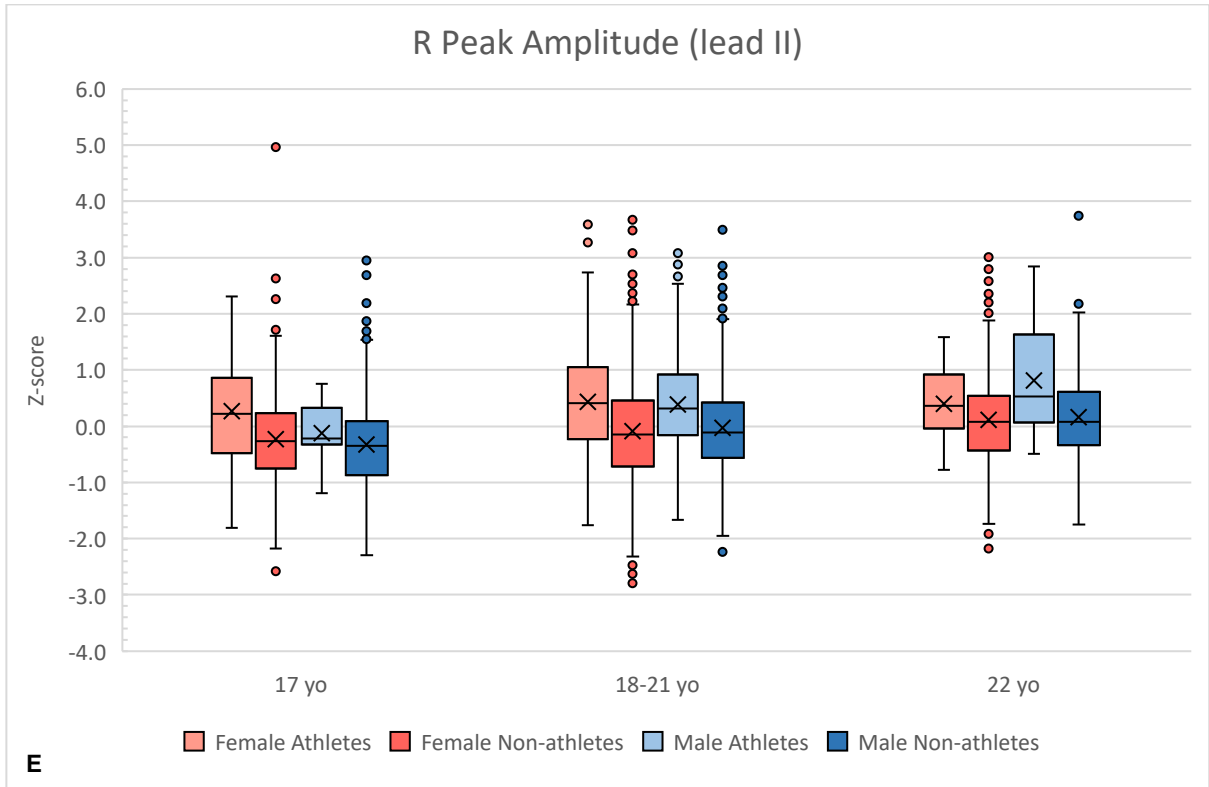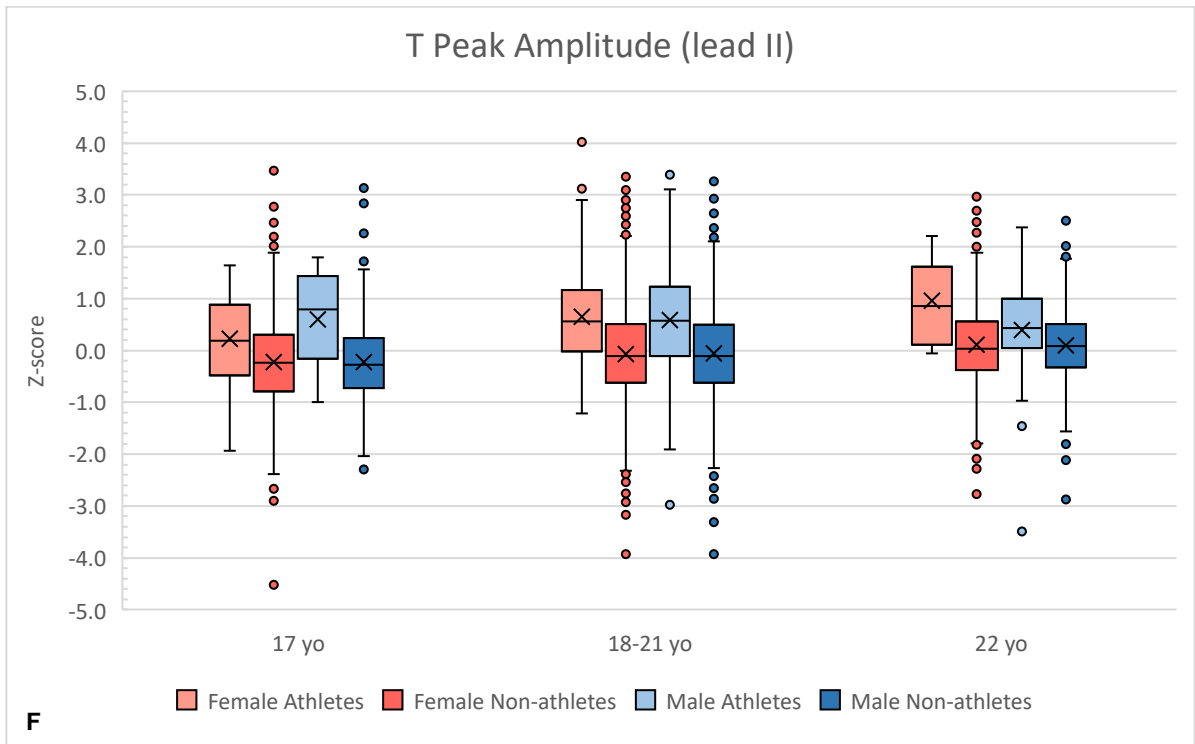

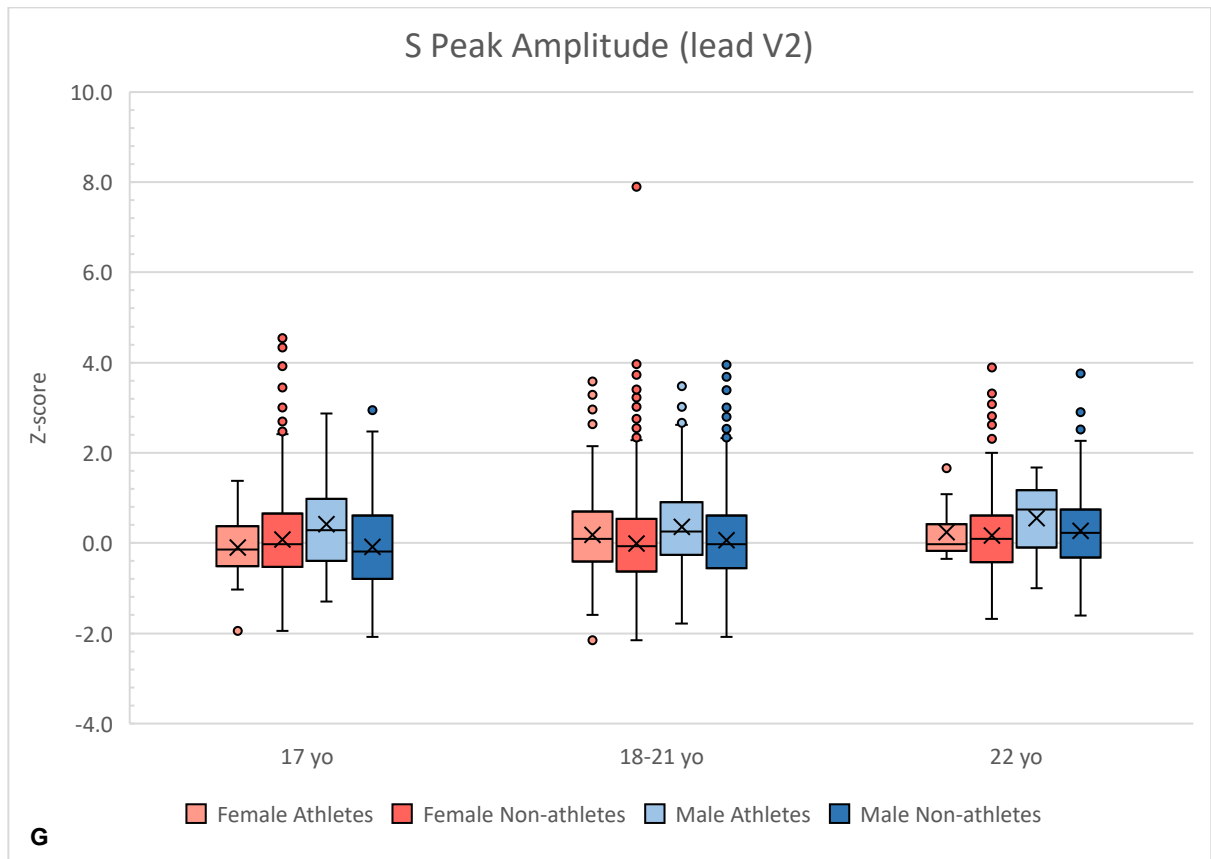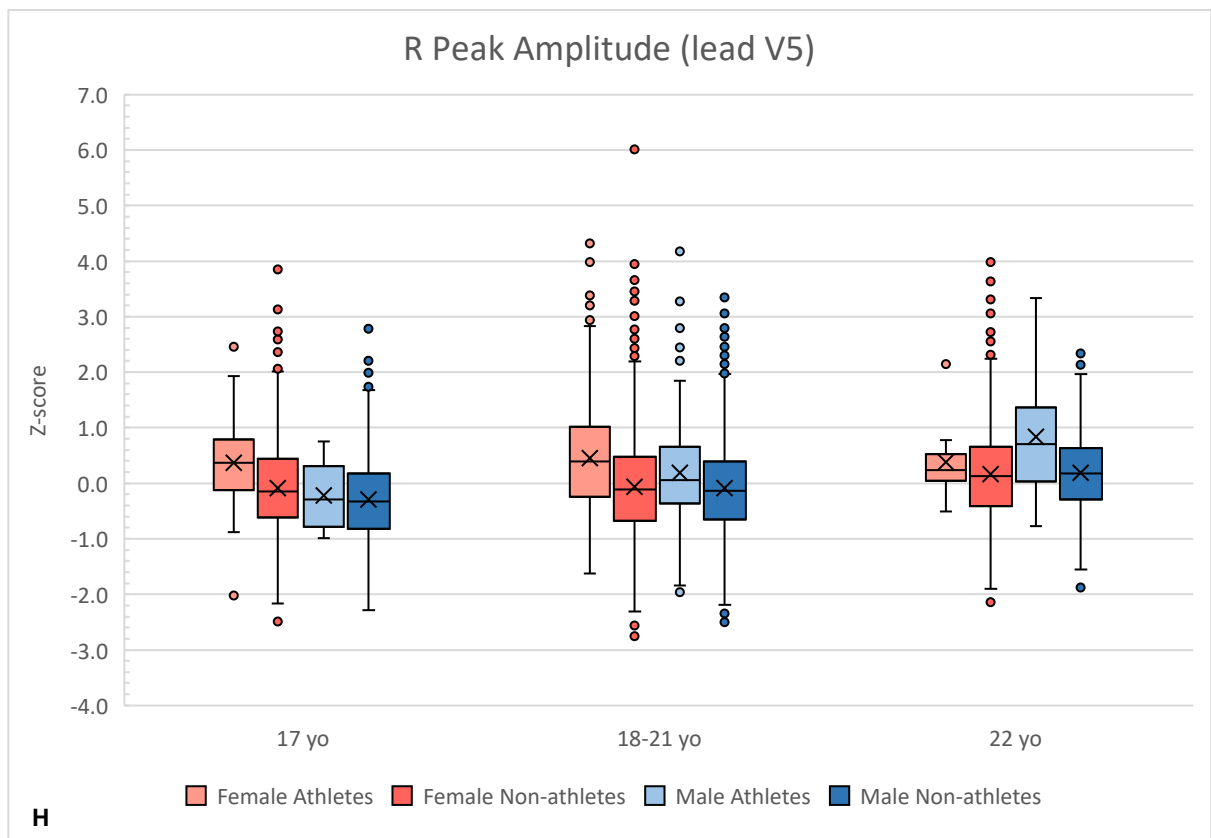

### R Peak Amplitude (lead V6)

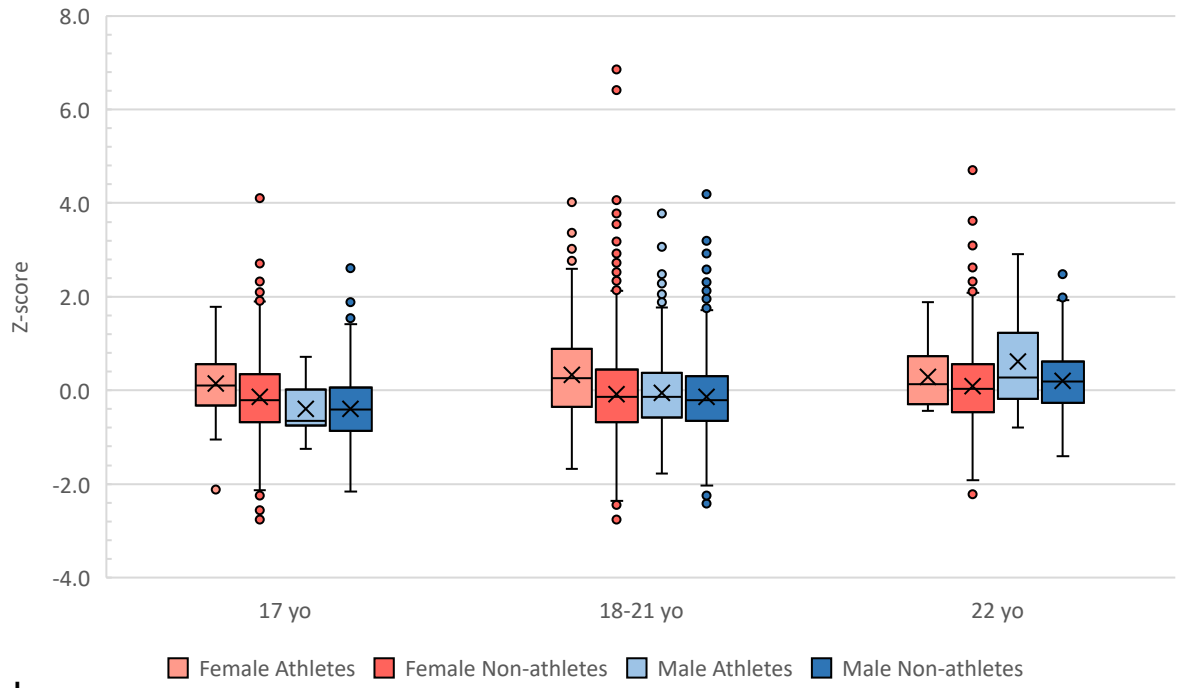

I
